# Supplementary material for: Neural Processing of Odors with Different Well-Being Associations—Findings from Two Consecutive Neuroimaging Studies
Source: MDPI journal article supplement (doi:10.3390/brainsci13040576), 2023-03-29
Supplement: s1 [file s1]

## Supplementary data

### **Study 1**

#### WB associated odors

One sample t-test was done to look at the mean activation for WB associated odors (flower + orange), using valence score as covariate. Contrast chosen was odor (ON) > odorless air (OFF). Results reported at  $p \text{ FWE} < 0.05$ . All results reported at whole brain level.

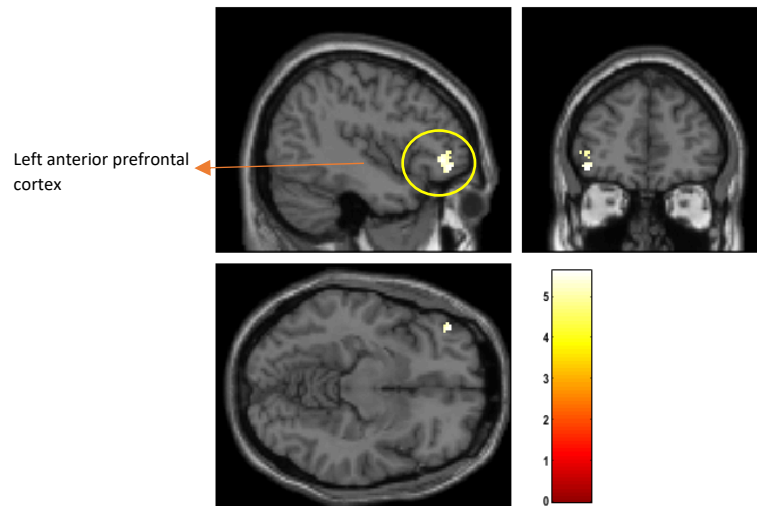

| k   | T value | x y z      | region                          |
|-----|---------|------------|---------------------------------|
| 116 | 5.62    | -42 46 -10 | Left anterior prefrontal cortex |

#### Neutral odors

One sample t-test was done to look at the mean activation for neutral odors (coffee + grass), using valence score as covariate. Contrast chosen was odor (ON) > odorless air (OFF). Results reported at  $p \text{ FWE} < 0.05$ .

| k | T value | x y z | region |
|---|---------|-------|--------|
| - | -       | -     | -      |

## Study 2

### WB associated odors

One sample t-test was done to look at the mean activation for WB associated odors (vanilla + soap), using valence score as covariate. Contrast chosen was odor (ON) > odorless air (OFF). Results reported at  $p \text{ FWE} < 0.05$ .

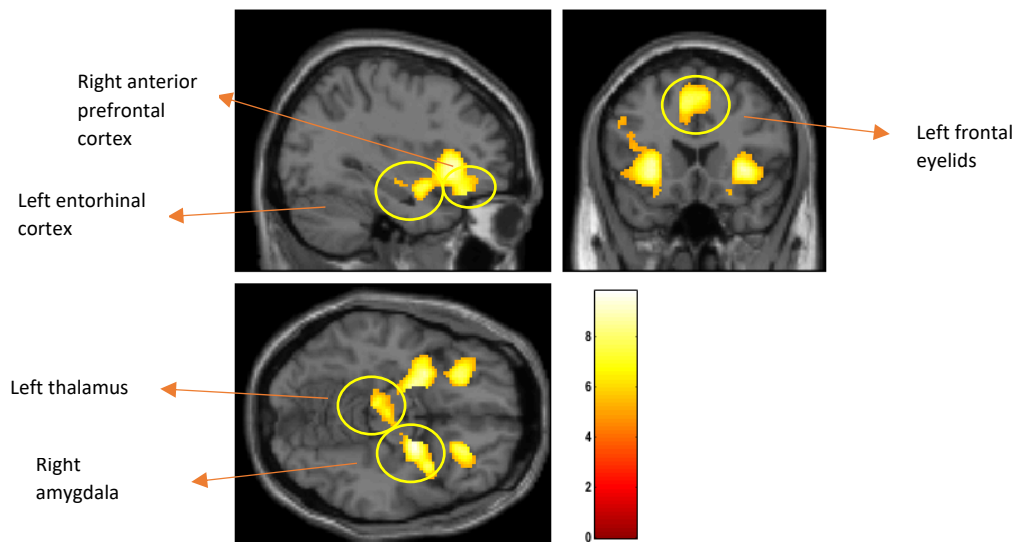

| k    | T value | x y z     | region                      |
|------|---------|-----------|-----------------------------|
| 3629 | 9.77    | -26 2 -18 | Left dorEntorhinal          |
| 2567 | 9.45    | 24 -2 -14 | Right amygdala              |
| 1128 | 8.15    | -6 16 50  | Left frontal Eyefields      |
| 236  | 6.32    | -2 -14 6  | Left thalamus               |
| 21   | 5.42    | 46 48 12  | Right ant prefrontal cortex |

### Neutral odors

One sample t-test was done to look at the mean activation for neutral odors (sheets + grass), using valence score as covariate. Contrast chosen was odor (ON) > odorless air (OFF). Results reported at  $p \text{ FWE} < 0.05$ .

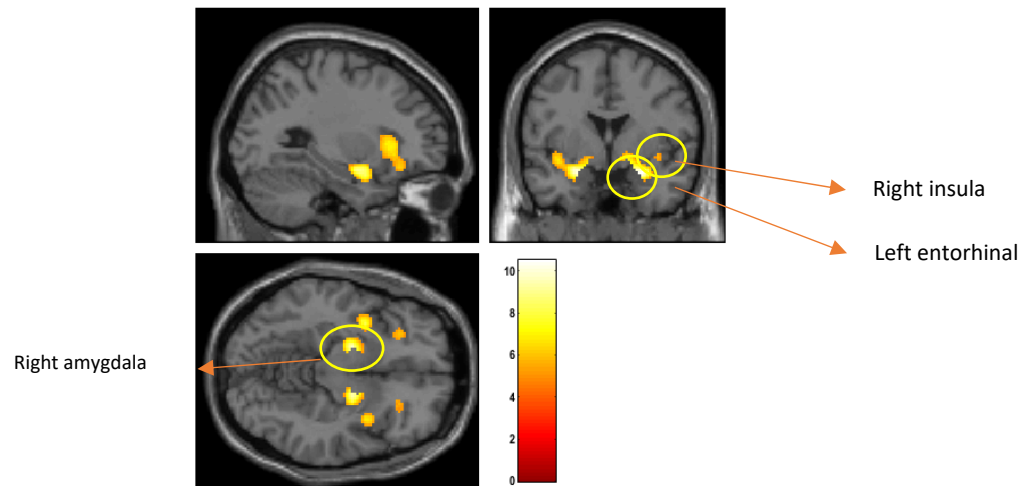

| k    | T value | x y z     | region               |
|------|---------|-----------|----------------------|
| 510  | 10.50   | 26 2 -18  | Left dorEntorhinal   |
| 1154 | 10.12   | -24 2 -18 | Right amygdala       |
| 507  | 7.99    | 32 26 0   | Right insula         |
| 32   | 5.42    | -6 16 52  | Left frontal Eyelids |
